# Supplementary material for: Transcriptomics identifies key defense mechanisms in rice resistant to both leaf-feeding and phloem feeding herbivores
Source: PubMed Central journal article supplement (PMC8243607; doi:10.1186/s12870-021-03068-5), 2021-06-30
Supplement: 12870_2021_3068_MOESM1_ESM.pdf [file 12870_2021_3068_MOESM1_ESM.pdf]

# Supplementary Figures

## **Transcriptomics identifies key defense mechanisms in rice resistant to both leaf-feeding and phloem feeding herbivores**

Yi Li, Boon Huat Cheah, Yu-Fu Fang, Yun-Hung Kuang, Shau-Ching Lin, Chung-Ta Liao, Shou-Horng Huang, Ya-Fen Lin, Wen-Po Chuang\*

\*Address for correspondence: Department of Agronomy, National Taiwan University, Taipei 10617, Taiwan;  
wenpo@ntu.edu.tw

**Fig. S1**

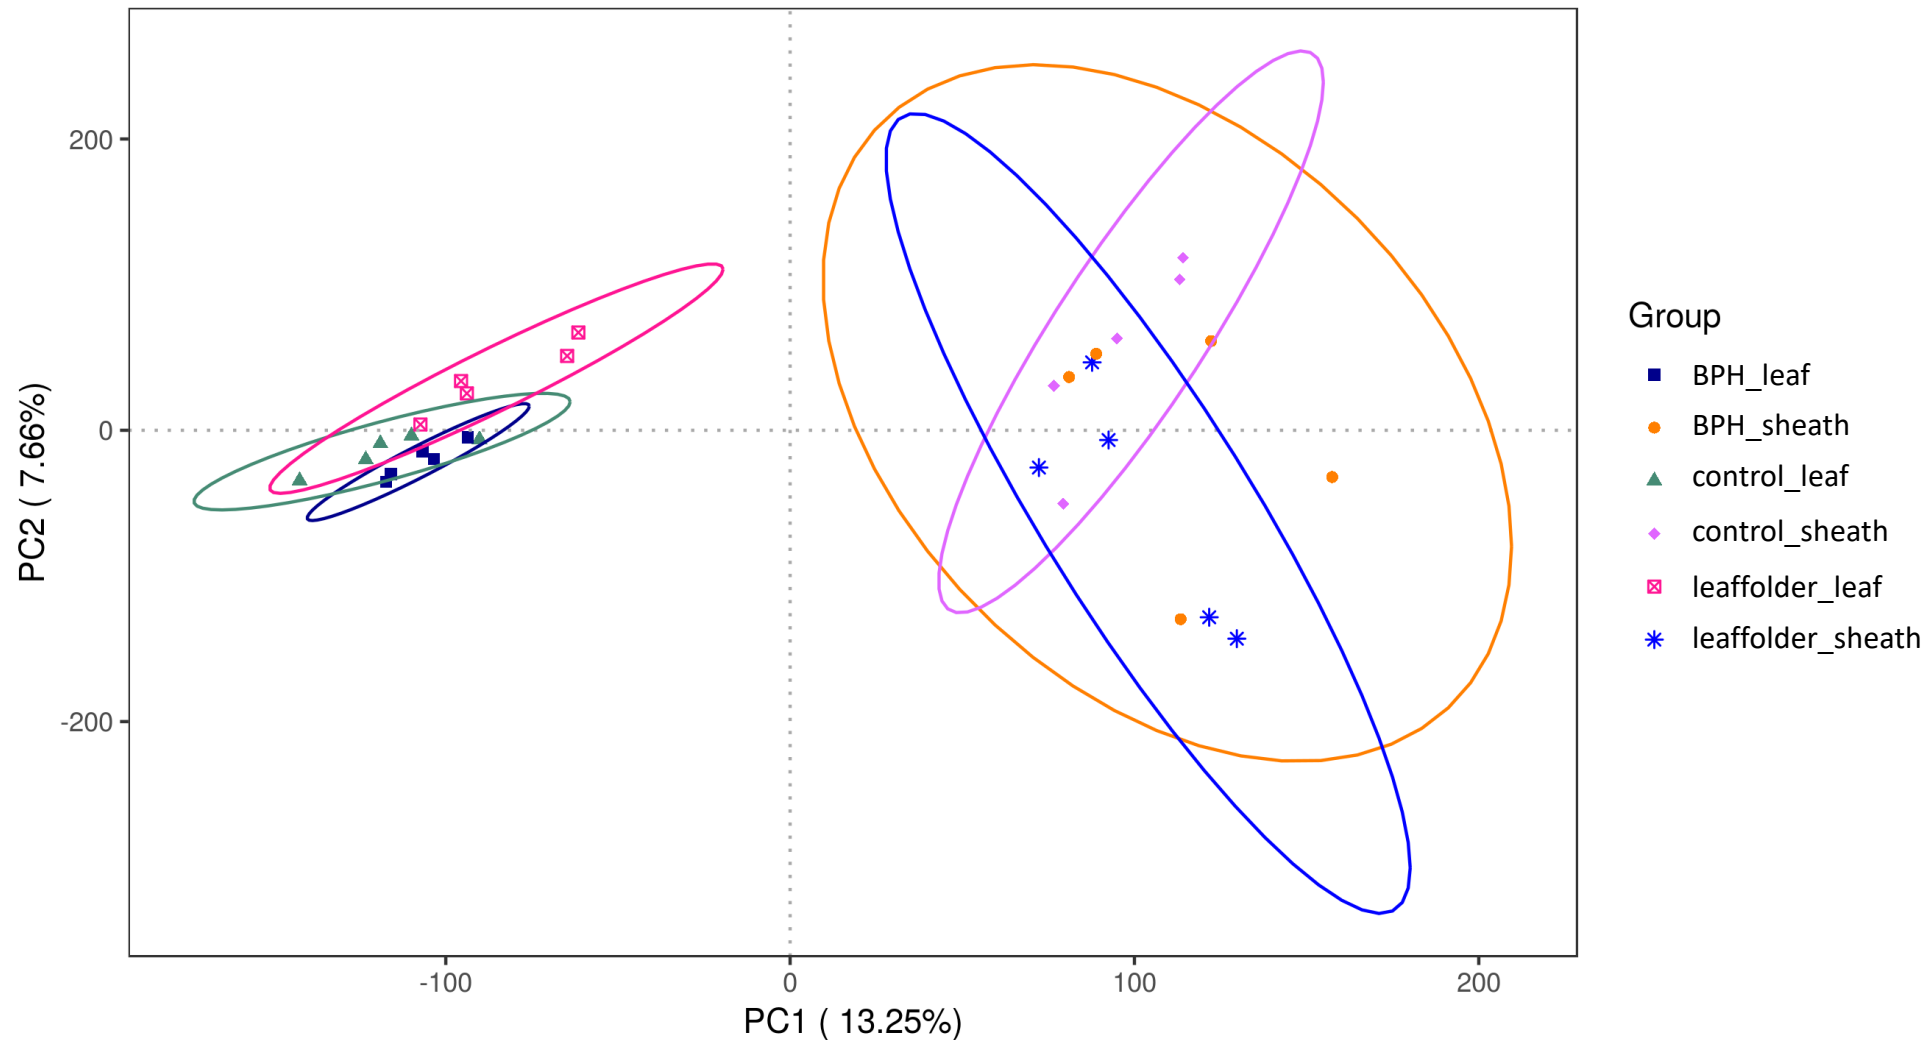

**Fig. S1.** Principal component analysis (PCA) plot of thirty RNA-Seq samples. The samples consisted of three experimental conditions (control, BPH or leaffolder infestation) and two tissues (leaves, sheaths) with five biological replicates for each combination.



# (Cellular component)

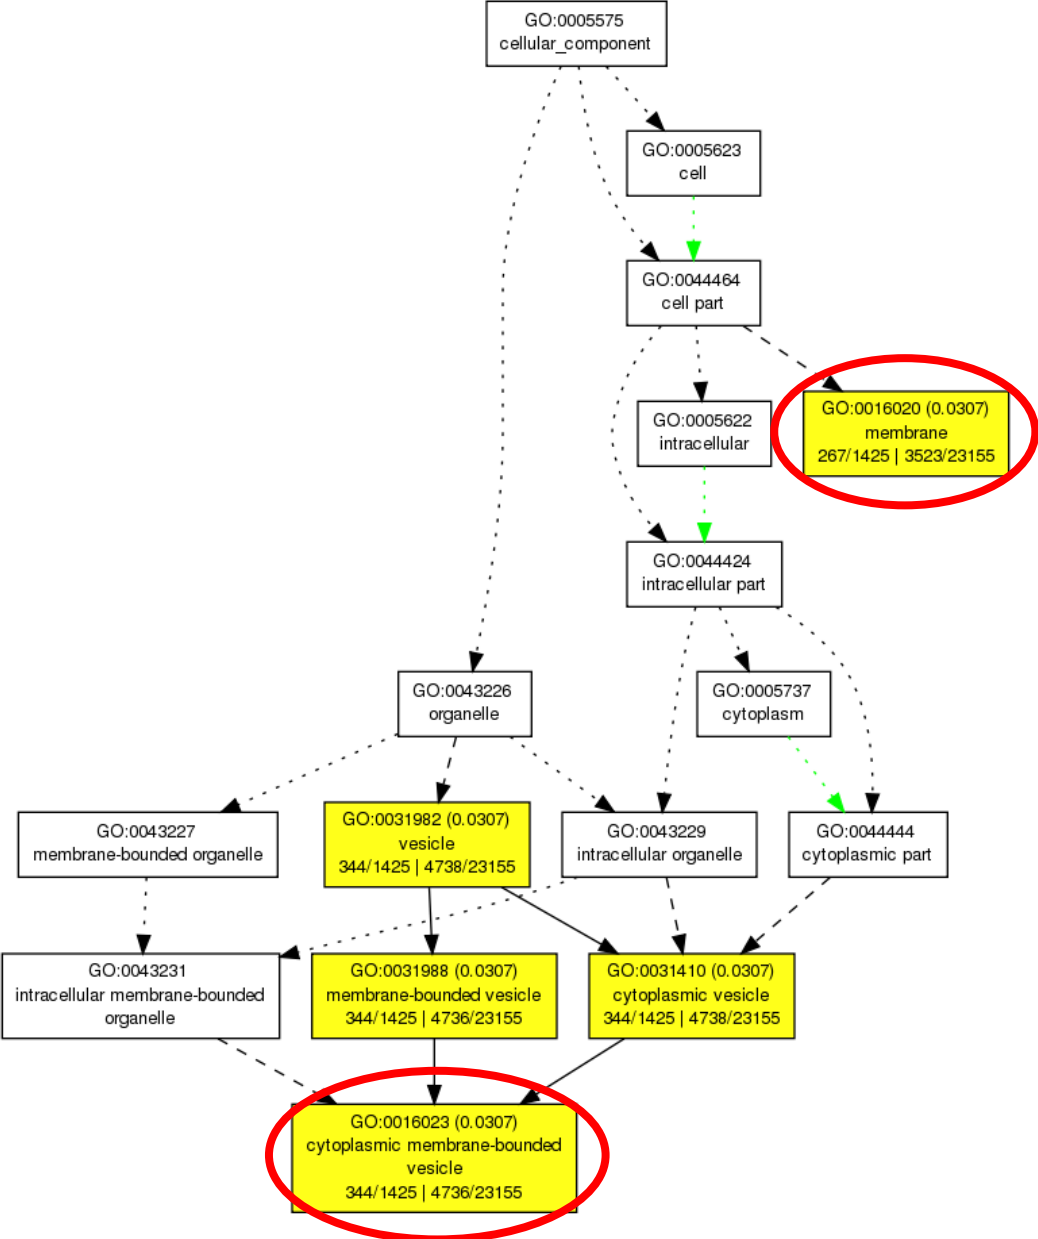



b. GO enrichment of downregulated genes in the leaf folder vs control\_leaf comparison (Biological process)

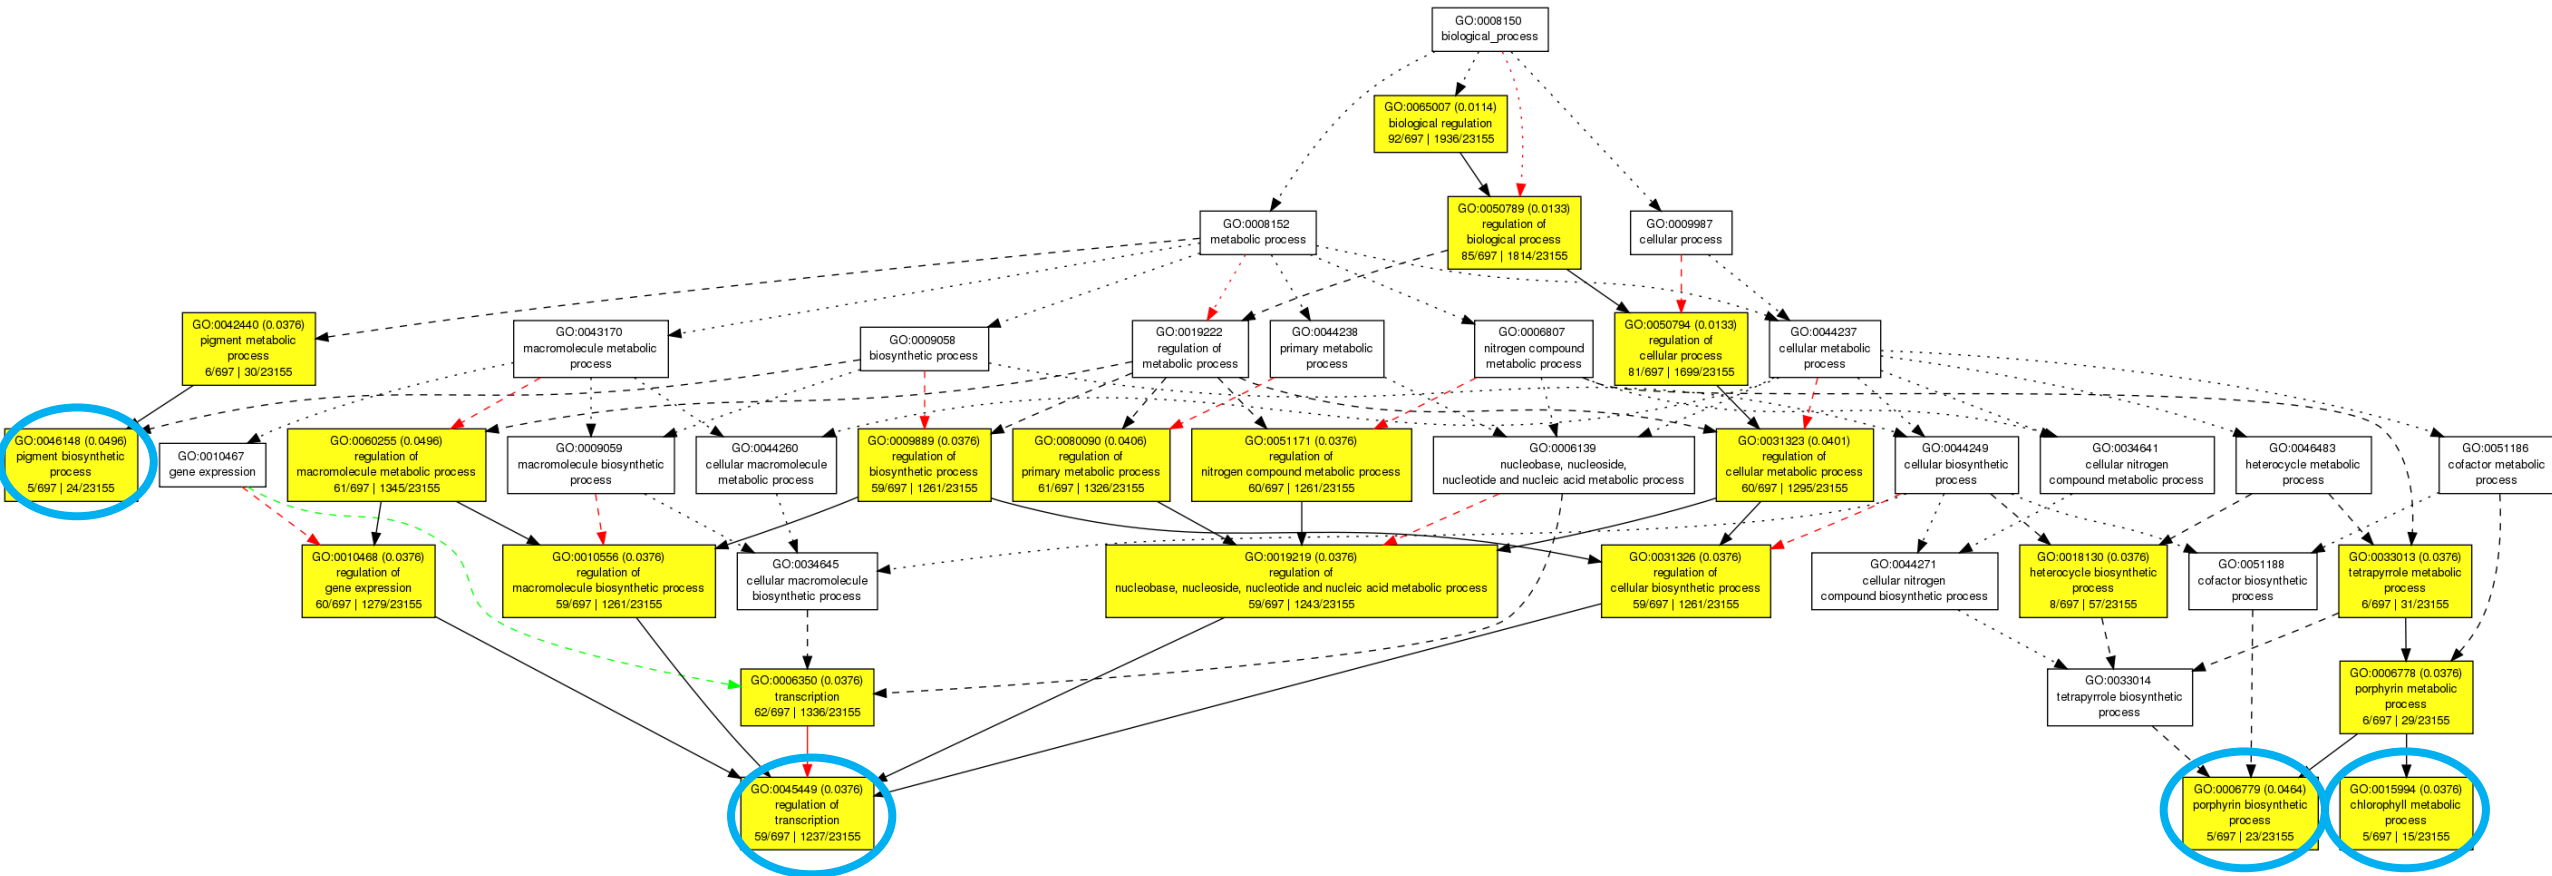

c. GO enrichment of upregulated genes in the leaffolder vs control\_sheath comparison (Biological process)

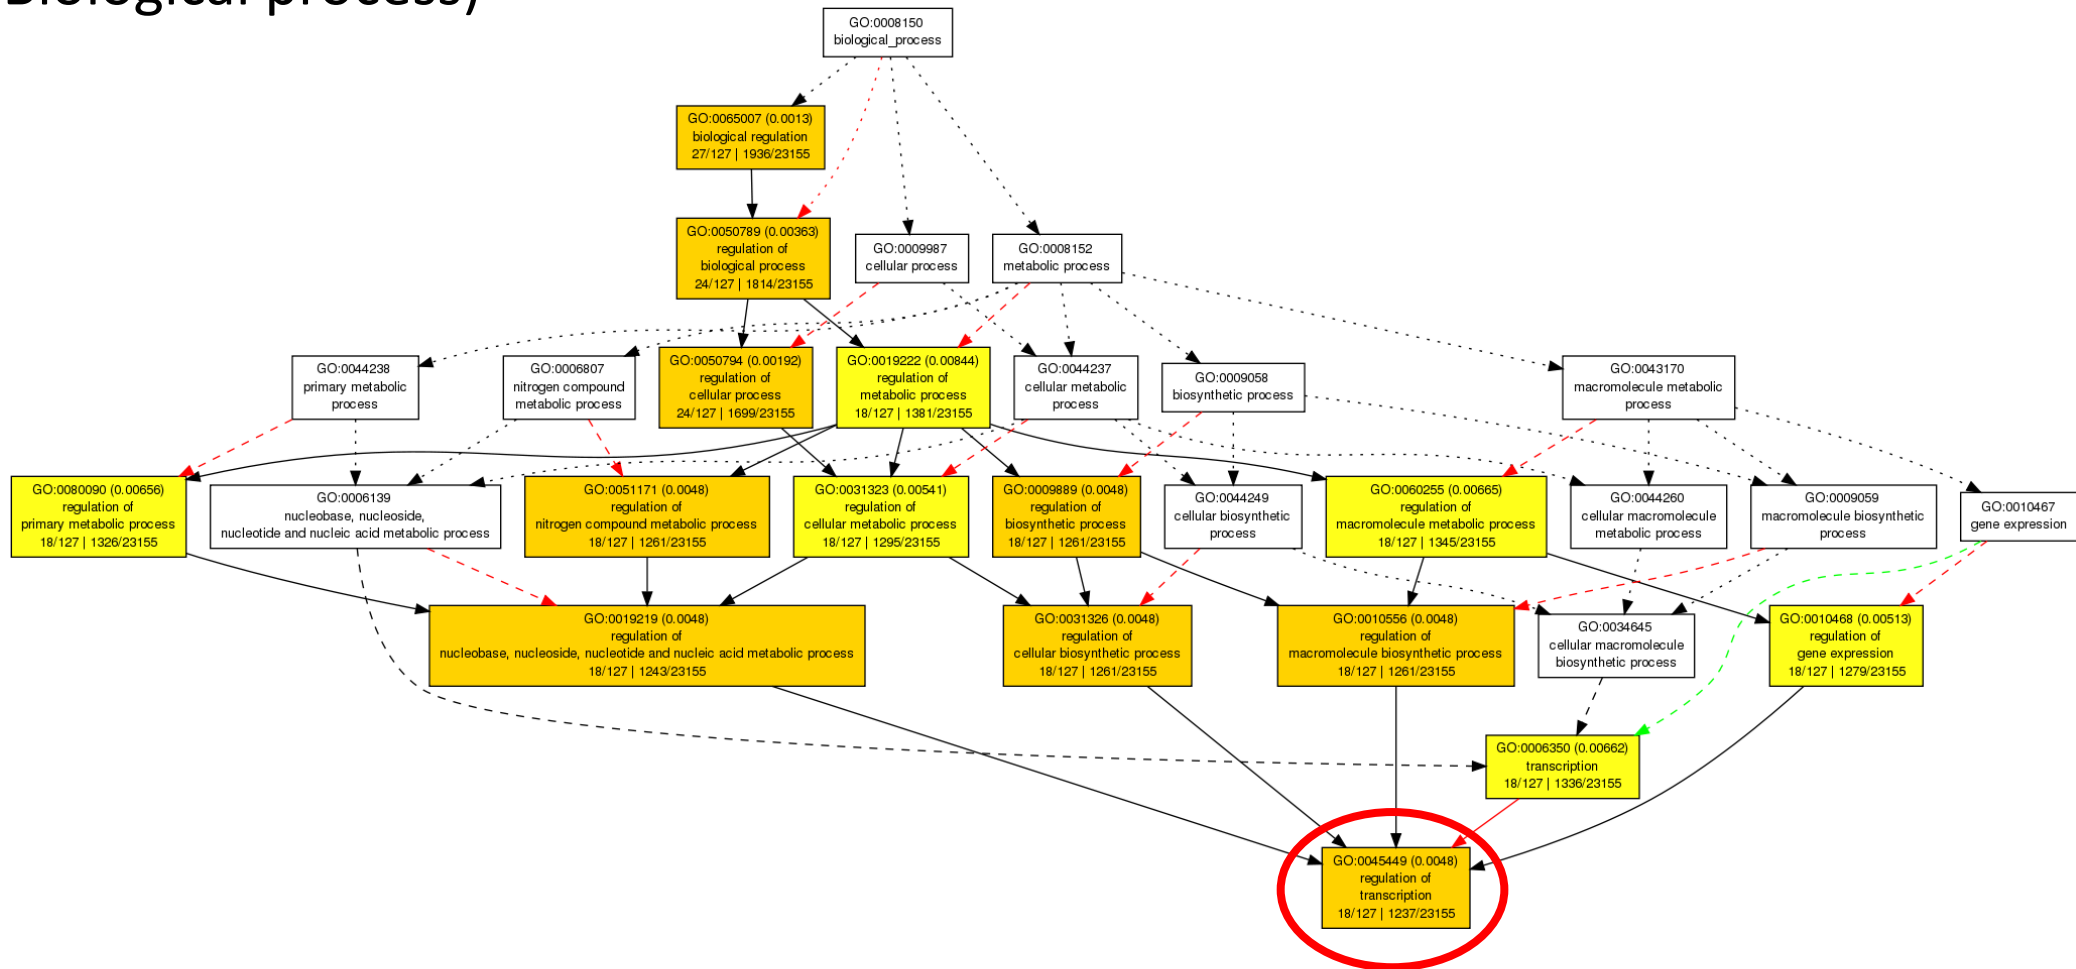

**Fig. S2.** Shortlisting nonredundant GO terms of leaffolder-responsive DEGs by manually curating the GO hierarchical tree graphs. GO enrichment of **a** upregulated genes in the leaffolder vs control\_leaf comparison, **b** downregulated genes in the leaffolder vs control\_leaf comparison and **c** upregulated genes in the leaffolder vs control\_sheath comparison.

# Fig. S3

a. GO enrichment of upregulated genes in the BPH vs control\_leaf comparison  
(Cellular component)

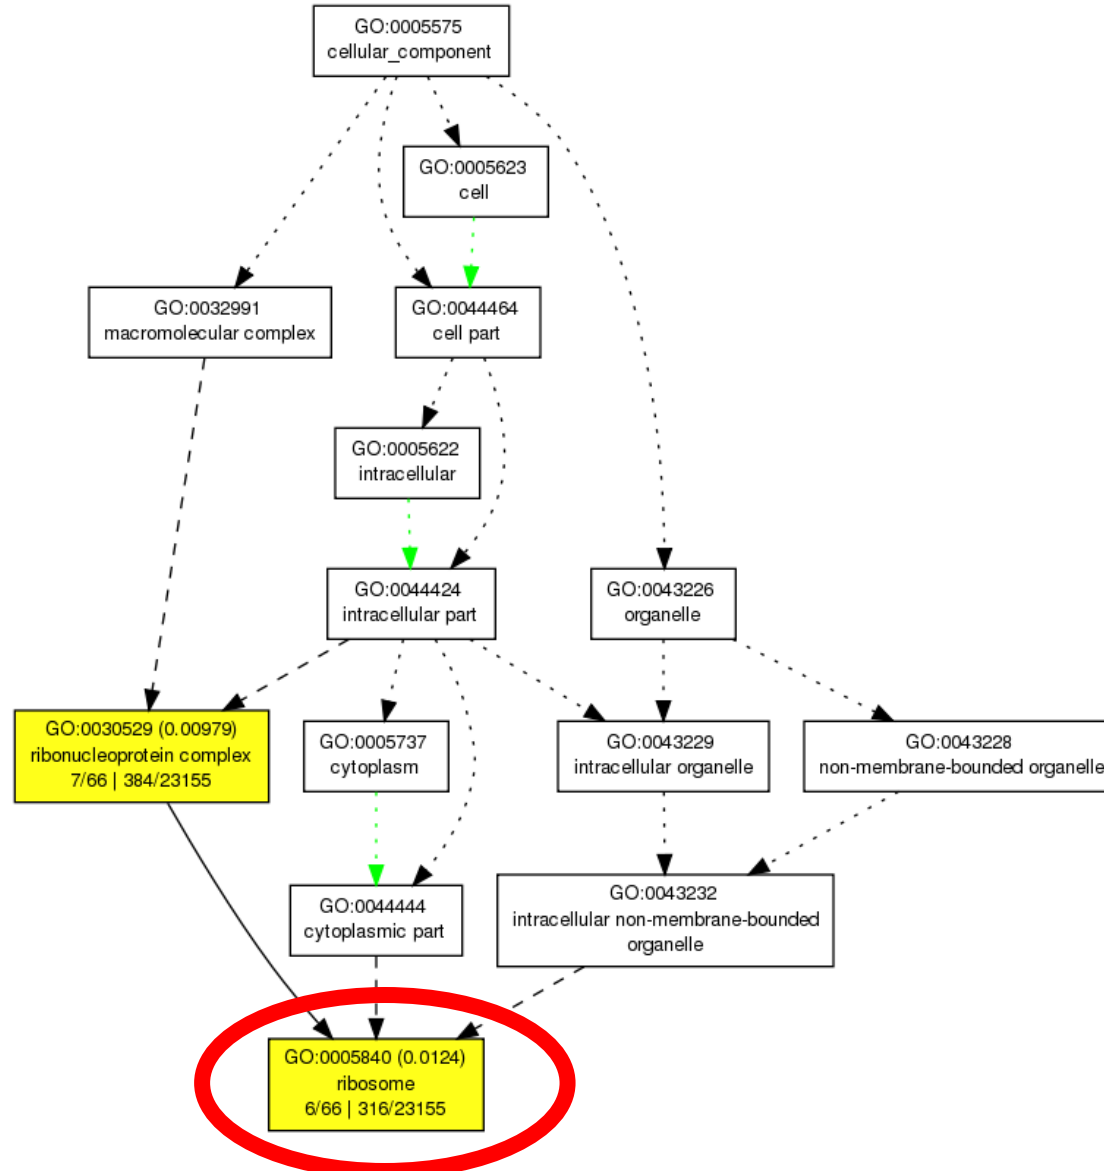



b. GO enrichment of downregulated genes in the BPH vs control\_leaf comparison  
(Molecular function)

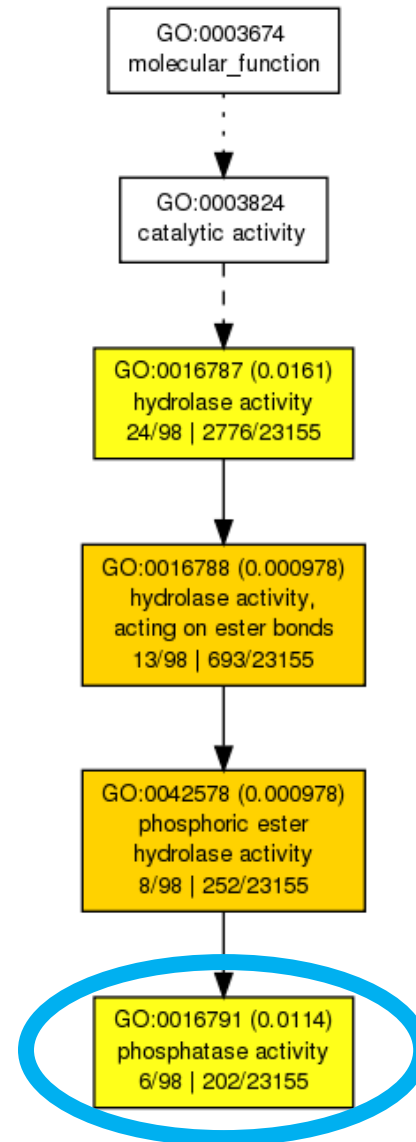

# c. GO enrichment of upregulated genes in the BPH vs control\_sheath comparison (Biological process)

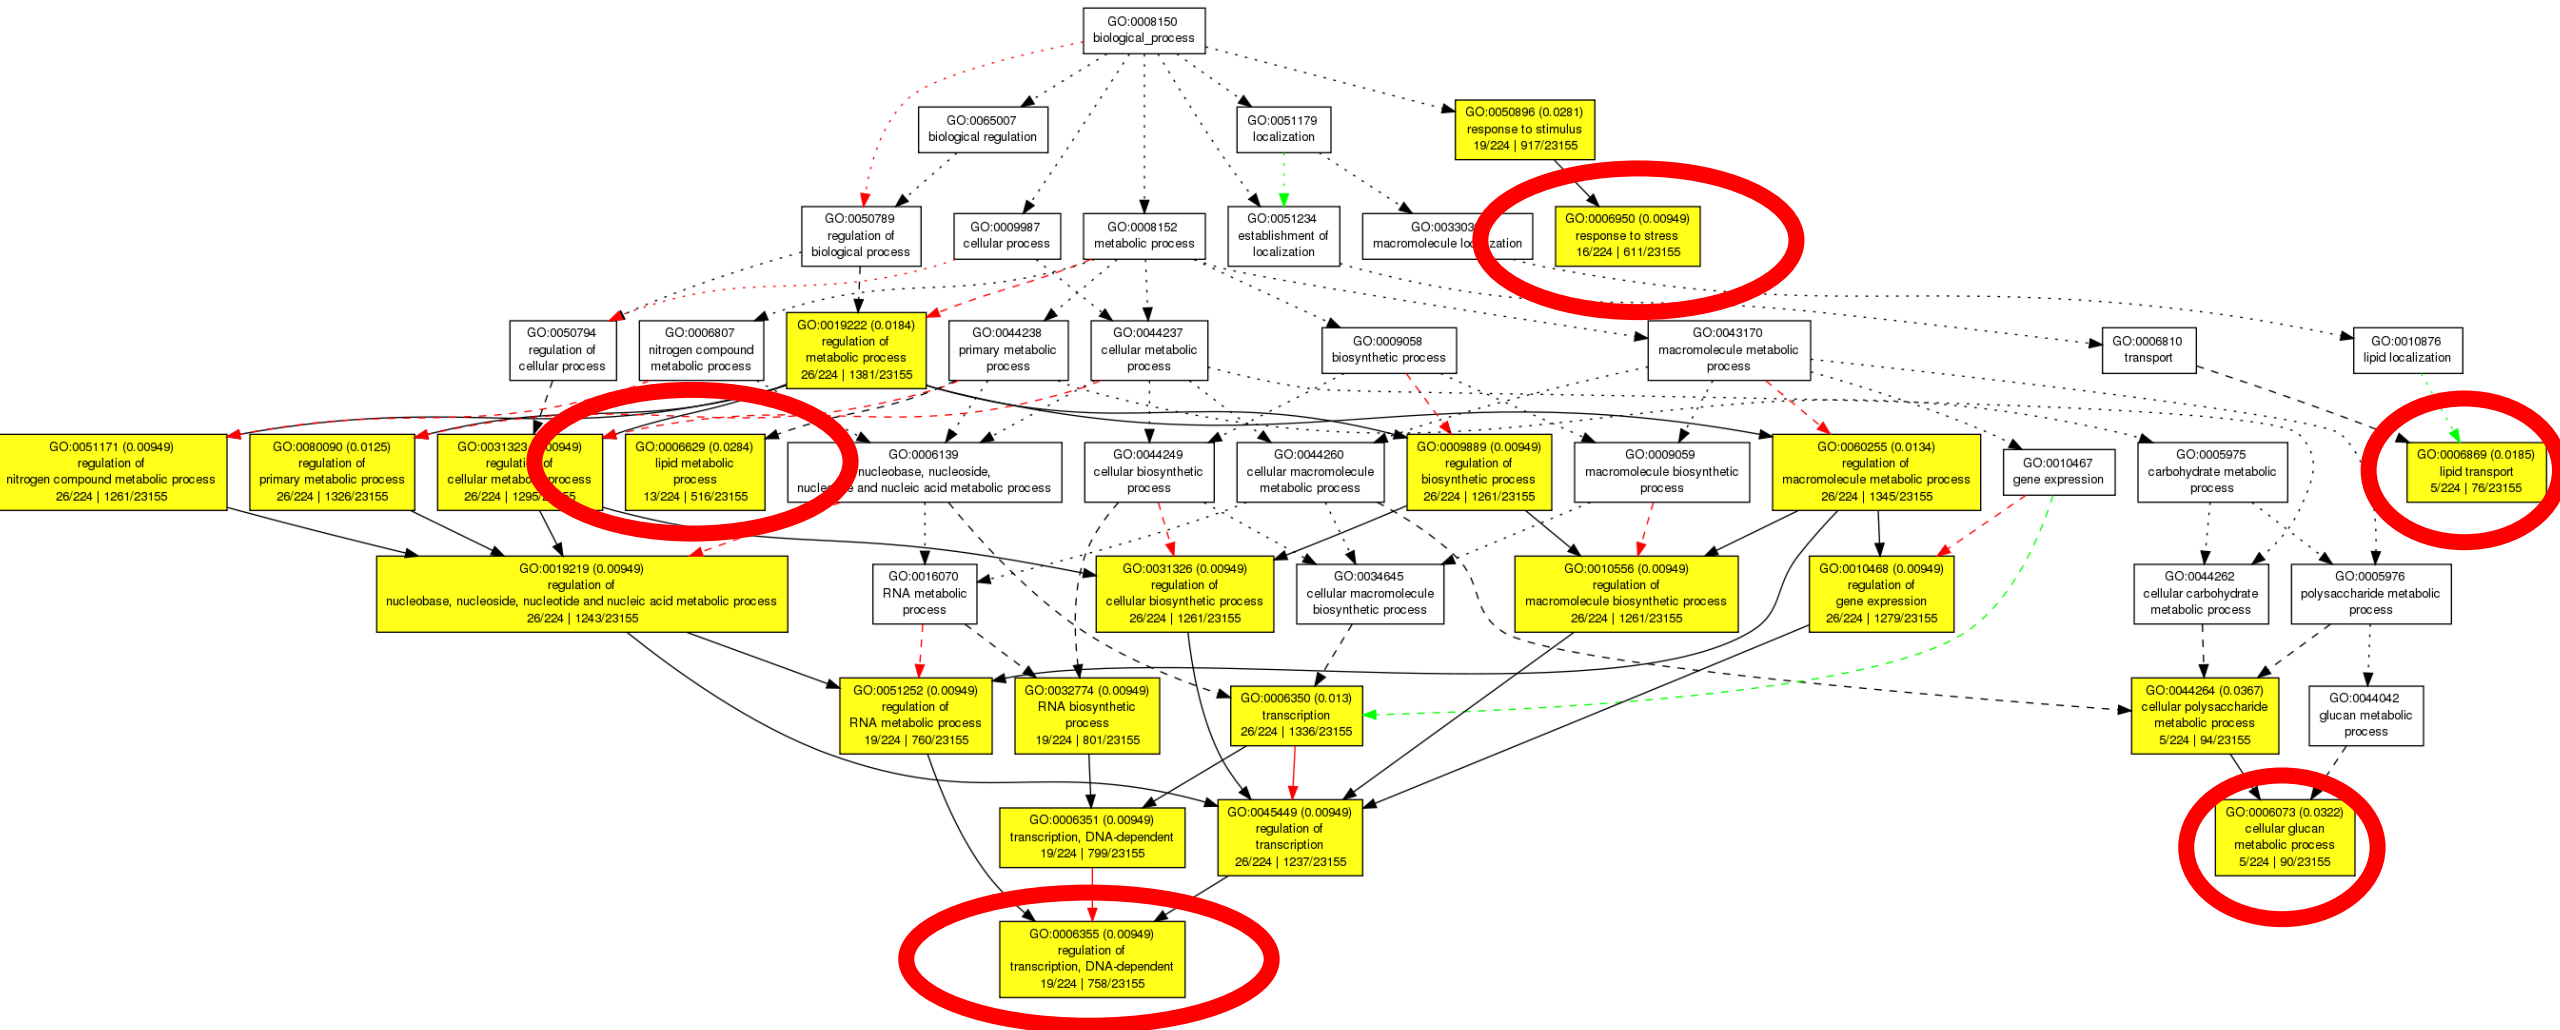

# (Cellular component)

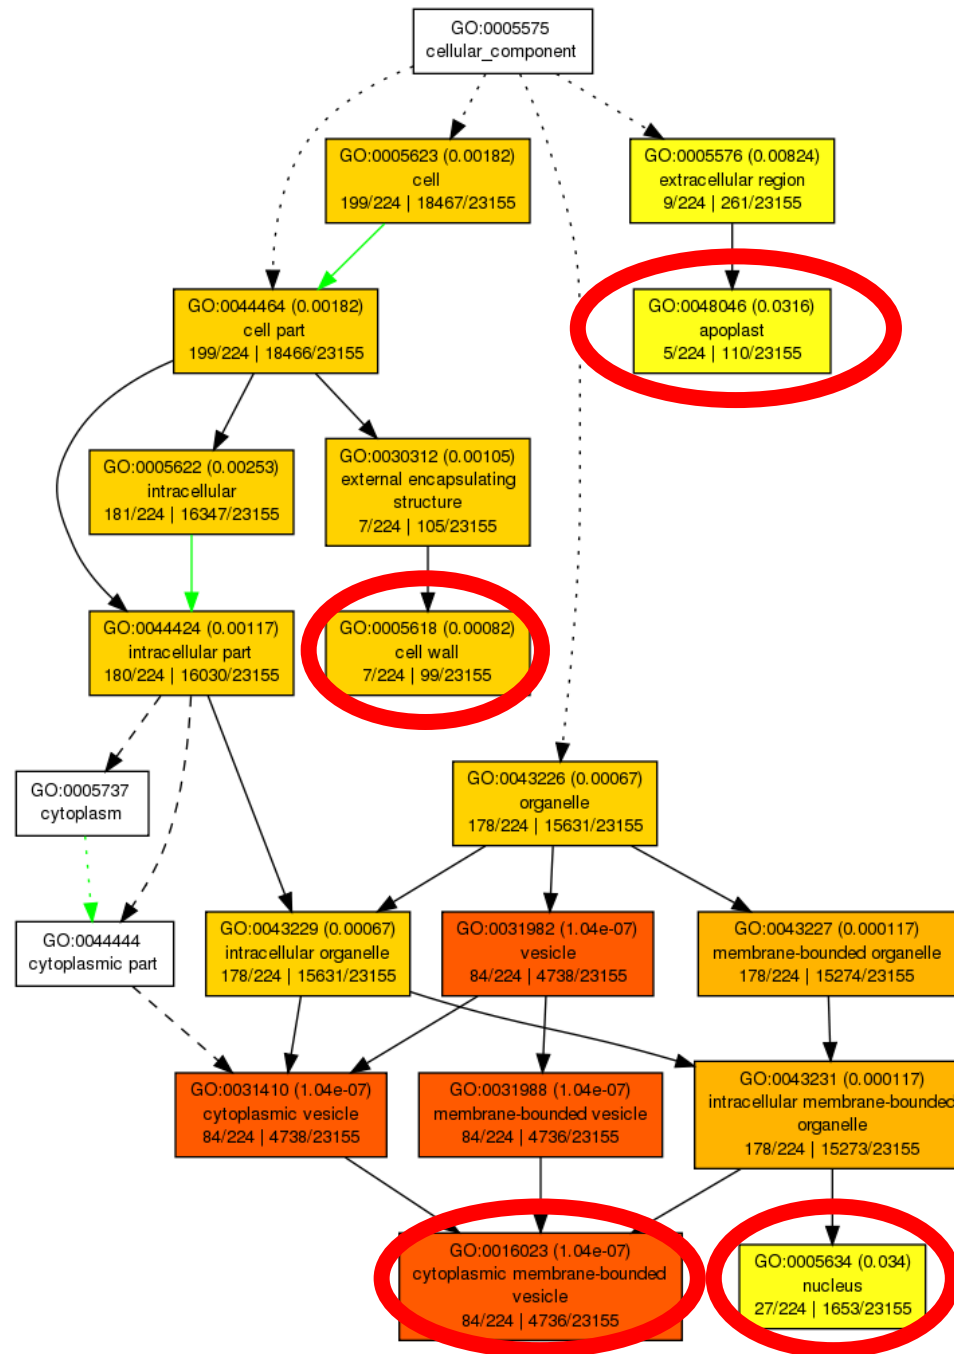

## (Molecular function)

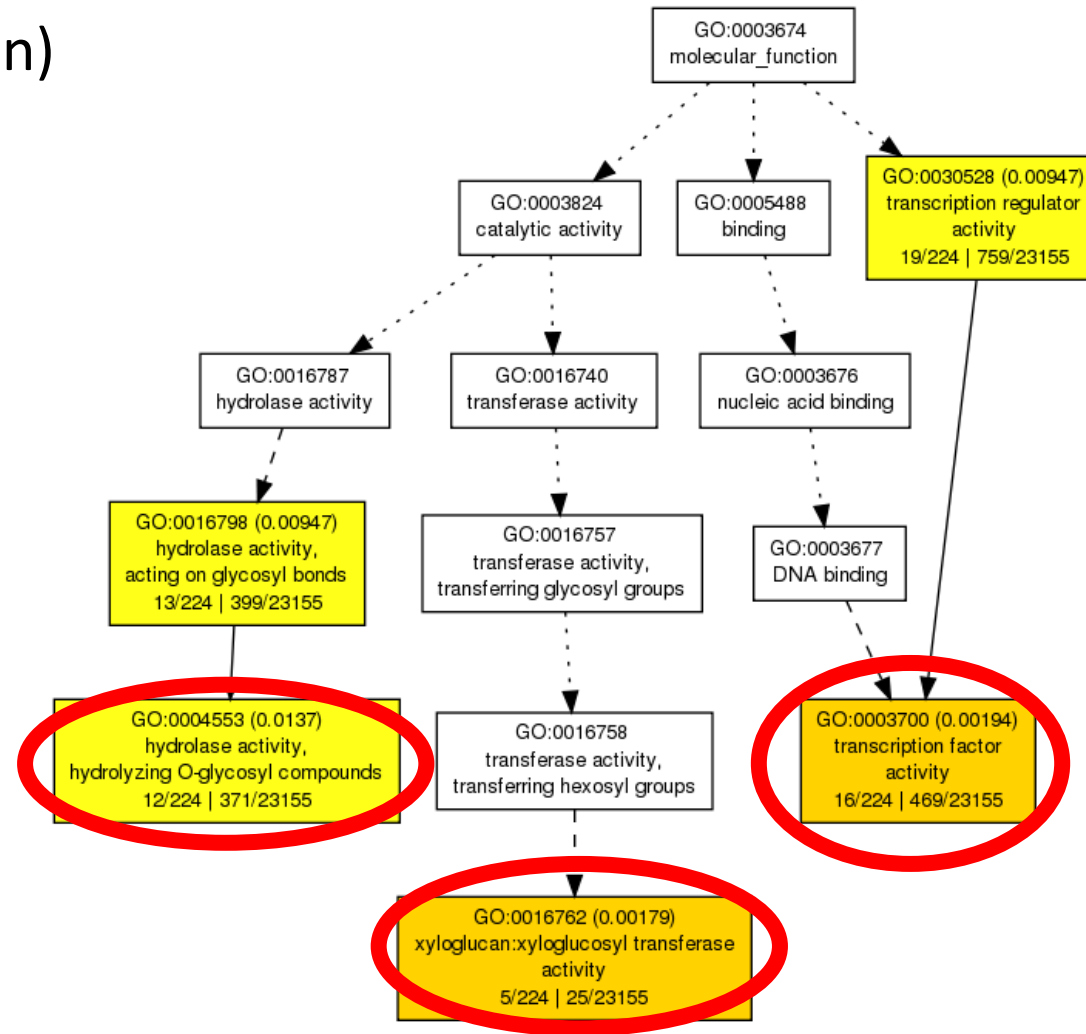

**Fig. S3.** Shortlisting nonredundant GO terms of BPH-responsive DEGs by manually curating the GO hierarchical tree graphs. GO enrichment of **a** upregulated genes in the BPH vs control\_leaf comparison, **b** downregulated genes in the BPH vs control\_leaf comparison and **c** upregulated genes in the BPH vs control\_sheath comparison.
